# Supplementary material
Source: PubMed Central journal article supplement (PMC2678612)
Supplement: 0900293106_0900293106SI.pdf [file 0900293106_0900293106SI.pdf]

# Supporting Text

Wang et al. 10.1073/pnas.0900293106

**Intracellular Ca<sup>2+</sup> Measurements.** Intracellular Ca<sup>2+</sup> concentration was measured by ratiometric imaging of fura-2 as described (1). Coverslips with cells grown on them were placed in ion-safe solution A (107 mM NaCl, 7.2 mM KCl, 1.2 mM MgCl<sub>2</sub>, 11.5 mM glucose, and 20 mM Hepes-NaOH, pH 7.2) and immersed in 2 μM fura-2/acetoxymethylester for 30 min at 20 °C. Subsequently, cells were washed and fura-2 was allowed to de-esterify for 30 min at 20 °C. Approximately 95% of the dye was confined in the cytosol, as determined by the remaining signal after saponin permeabilization (2). Ca<sup>2+</sup> measurements were performed on an InCyt dual-wavelength fluorescence imaging system (Intracellular Imaging Inc.). Fura-2 was excited at 340 and 380 nm, and the fluorescence emission was monitored at 505 nm. Intracellular Ca<sup>2+</sup> concentrations are represented by the ratio of the fluorescence intensities measured at 340 and 380 nm from groups of single cells. Measurements are shown as means ± SEM of traces from groups of individual cells (ranging from 9 to 25 cells) and are representative of 3 or more independent experiments.

**Electrophysiological Measurements.** Studies were performed in HEK Orai1-CFP cells that were transfected with S2-YFP, S1-CT-YFP, or S2-CT-YFP. Conventional whole-cell recordings were undertaken as described (3). Immediately after establishment of the whole-cell configuration, voltage ramps spanning from -100 to +100 mV in 50 ms were delivered from a holding potential of 0 mV at a rate of 0.5 Hz. The intracellular solution contained 145 mM CsGlu, 10 mM Hepes, 10 mM EGTA, 8 mM NaCl, 6 mM MgCl<sub>2</sub>, 2 mM Mg-ATP (total 8 mM Mg<sup>2+</sup>), and 3 mM CaCl<sub>2</sub>, pH 7.2. TRPM7 activity was suppressed by the presence of 8 mM Mg<sup>2+</sup> and ATP (1). The free Ca<sup>2+</sup> was 100 nM as calculated by using WEBMAXCLITE ([www.stanford.edu/~cpatton/downloads.htm](http://www.stanford.edu/~cpatton/downloads.htm)). The extracellular solutions contained 145 mM NaCl, 10 mM CaCl<sub>2</sub>, 10 mM CsCl, 2 mM MgCl<sub>2</sub>, 2.8 mM KCl, 10 mM Hepes, and 10 mM glucose, pH 7.4. A 10-mV junction potential compensation was applied.

**Western Analyses.** Cells were lysed in chilled Nonidet P-40 buffer [1% (vol/vol) Nonidet P-40, 150 mM NaCl, 50 mM Tris-HCl (pH

8.0), containing 100 μM phenylmethylsulfonyl fluoride and Sigma protease inhibitor mixture I] followed by incubation for 30 min at 4 °C and subsequent centrifugation (18,000 × g, 20 min at 4 °C). The protein content of the supernatants was quantified by using Bio-Rad DC protein assay kits. Protein extracts (15 μg/lane of each) were resolved on 8% SDS-polyacrylamide gels and electroblotted onto Bio-Rad Immun-Blot PVDF membranes. After transfer, the PVDF membranes were blocked (1 h, room temperature) in Tris-buffered saline-Tween 20 (TBST; 10 mM Tris-HCl, pH 8.0, 150 mM NaCl, 0.1% Tween 20) containing membrane blocking agent (5%) (Amersham Biosciences) and subsequently incubated with corresponding primary antibodies (1 h, 22 °C). Membranes were washed 2 times (7 min) in TBST and incubated with secondary antibody (30 min, IgG conjugated to horseradish peroxidase). Subsequently, membranes were washed 3 times (5 min) in TBST followed by a single wash (5 min) in Tris-buffered saline (TBS; 150 mM NaCl, 10 mM Tris-HCl, pH 8.0). Peroxidase activity was visualized with a ECL kit as according to the manufacturer's instructions (Amersham Biosciences).

**Fluorescence Imaging and FRET Measurements.** Experiments were performed in HEK293 cells stably expressing either Orai1-CFP or empty vector (pIRES) that were transiently transfected with S1-CT-YFP or S2-CT-YFP. Fluorescence was examined with a Leica DMI 6000B fluorescence microscope equipped with CFP (436<sub>Ex</sub>/480<sub>Em</sub>) and YFP (500<sub>Ex</sub>/535<sub>Em</sub>) filters controlled by Slidebook Software (Intelligent Imaging Innovations). All images were obtained at room temperature with 63× oil objective (N.A. 1.4; Leica), and image analyses were performed with Slidebook software. CFP (436<sub>Ex</sub>/480<sub>Em</sub>) and FRET<sub>raw</sub> (436<sub>Ex</sub>/535<sub>Em</sub>) were monitored at a rate of 0.1 Hz. Two-channel corrected FRET was calculated based on the following formula:  $FRET_c = (F_{raw} - F_d/D_d \times F_{CFP})/F_{CFP}$ , where FRET<sub>c</sub> represents the corrected total amount of energy transfer, F<sub>raw</sub> represents fluorescence measured through the CFP/YFP ET filter cube, F<sub>CFP</sub> represents measured CFP fluorescence, and F<sub>d</sub>/D<sub>d</sub> represents measured bleed-through of CFP through the YFP filter (0.592248). Fluorescence images and FRET analyses shown are typical of at least 3 separate experiments.

1. Soboloff J, et al. (2005) Role of endogenous TRPC6 channels in Ca<sup>2+</sup> signal generation in A7r5 smooth muscle cells. *J Biol Chem* 280:39786–39794.
2. Ma HT, et al. (2000) Requirement of the inositol trisphosphate receptor for activation of store-operated Ca<sup>2+</sup> channels. *Science* 287:1647–1651.

3. Soboloff J, et al. (2006) Orai1 and STIM reconstitute store-operated calcium channel function. *J Biol Chem* 281:20661–20665.
